# Supplementary material
Source: Research Square preprint supplement (doi:10.21203/rs.3.rs-9315983/v1)
Supplement: Supplementary file 1 [file bb58265a1f8d74f5afc99da1.docx]

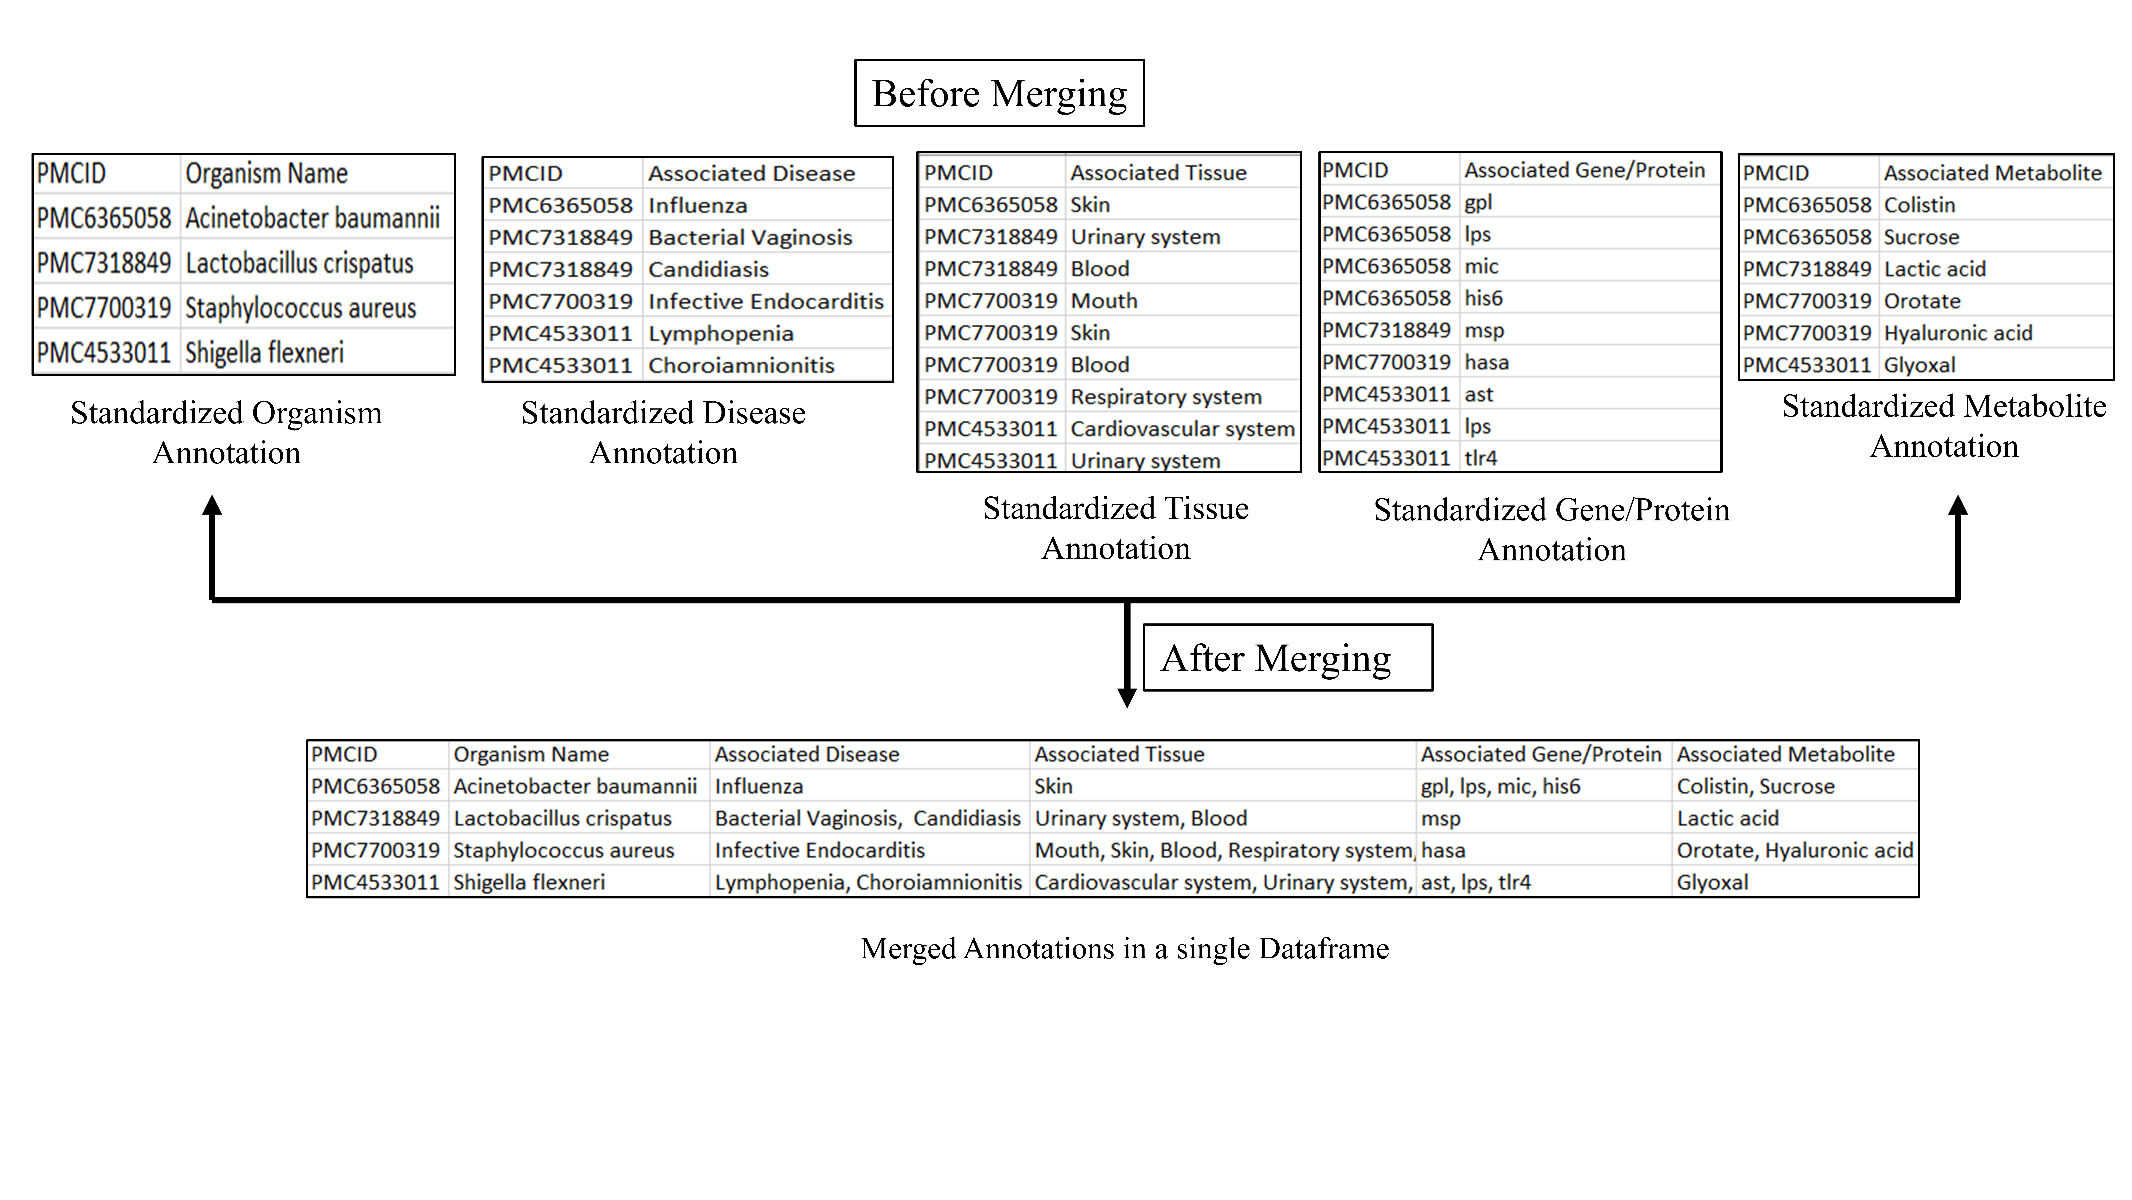


**Figure S1:** Standardized annotation files are merged using PMCID to create a single consolidated dataset as shown.

Supplementary Table S1

Open-Source Tools of Python and their functionalities utilized in the software

| Library | Version (≥) | Functional Role in Pipeline |
| --- | --- | --- |
| Pandas | 1.3.0 | Data preprocessing, cleaning, and integration |
| NumPy | 1.20.0 | Numerical operations, matrix computations |
| SciPy | 1.7.0 | Statistical analysis (chi-square, corrections) |
| Requests | 2.25.0 | API-based data retrieval (EuropePMC, NCBI E-Utilities) |
| BeautifulSoup4 | 4.9.0 | Parsing and structured extraction of biomedical text |
| NLTK | 3.6.0 | N-gram algorithm and natural language processing |
| Tqdm | 4.60.0 | Progress tracking and monitoring |
| Psutil | 5.9.0 | System-level resource monitoring |
| Pillow | 9.0.0 | Image generation and visualization handling |

Supplementary Table S2

FAQ/Tutorial Section

| 1. What is an opportunistic pathogen? | Opportunistic pathogens are microorganisms that typically don't cause disease in people with healthy immune systems but can cause serious infections in individuals with weakened immunity. These pathogens "take advantage" of opportunities such as a compromised immune system, breached barriers (like skin or mucous membranes), or altered microbiota (such as after antibiotic treatment). |
| --- | --- |
| 1. How do I search for specific pathogens? | One can search for pathogens using the search box on our home page. Select a category (Organism, Diseases, Genes, Metabolites, or Tissue) from the dropdown menu, enter your search term in the input field, and click the "Search" button. The results will be displayed in a table format on the search results page. |
| 1. What information is available for each pathogen? | Our database provides comprehensive information about each pathogen, including:   - Taxonomic classification - Associated diseases - Associated genes - Associated Metabolites - Associated Tissues - Interactive network visualizations showing relationships between these elements |
| 1. How often is the database updated? | We update our database regularly to incorporate new research findings and expand our collection of pathogens. Major updates are announced on our home page in the "Recent Updates" section. We strive to provide the most current and accurate information available. |
| 1. Can I contribute to the database? | Yes, we welcome contributions from researchers and experts in the field. If you have data or information that you believe would enhance our database, please contact us through the Contact Us page. Our team will review your submission and work with you to incorporate valuable additions to the database. |
